# Supplementary material for: Approaches to engineer stability of beetle luciferases
Source: PubMed Central journal article supplement (PMC3962189; doi:10.5936/csbj.201209004), 2012-10-09
Supplement: CSBJ-2-e201209004_SM0001.pdf [file CSBJ-2-e201209004_SM0001.pdf]

## SUPPLEMENTARY MATERIAL

### Approaches to engineer stability of beetle luciferases

**Mikhail I. Koksharov\***, Natalia N. Ugarova

*Department of Chemical Enzymology, Faculty of Chemistry, Lomonosov Moscow State University,  
Moscow, 119991, Russia. E-mail: [mkoksharov@gmail.com](mailto:mkoksharov@gmail.com)*

**Table S1.** Key enhanced mutant variants of beetle luciferases described in this mini-review

| Luciferase                       | Properties of the mutant                                                                                                                                                                                                                                    | Mutagenesis approach <sup>1</sup> | Ref.     |
|----------------------------------|-------------------------------------------------------------------------------------------------------------------------------------------------------------------------------------------------------------------------------------------------------------|-----------------------------------|----------|
| <i>Photuris pennsylvanica</i>    | 28-point thermostable mutant: half-life of 27 h at 65°C; 4% activity compared with WT <i>P. pyralis</i> luciferase [49]                                                                                                                                     | Directed evolution                | [61,62]  |
| <i>Photinus pyralis</i>          | The set of single mutants with increased thermostability: A215L, T214A, I232A, F295L, E354K                                                                                                                                                                 | Random                            | [34, 57] |
|                                  | 4-point thermostable mutant T214A/I232A/F295L/E354K: 1.9-5.6-fold increase in stability at 35-40°C; 56% activity compared with WT                                                                                                                           | Site-directed (SD)                | [34]     |
|                                  | 5-point thermostable mutant T214A/A215L/ I232A/F295L/E354K: 44-fold increase in half-life at 37°C: from 15 min to 11.5 h; 90% activity compared with WT                                                                                                     |                                   | [18,26]  |
|                                  | 12-point thermostable mutant: half-life of 15 min at 37°C; 15% activity compared with WT                                                                                                                                                                    |                                   | [49]     |
|                                  | 5-point thermostable mutant F14R/L35Q/V182K/I232K/F465R: 6-fold increase in half-life at 43°C: from 5 min to 33 min; 82% activity compared with WT                                                                                                          | Rational design, SD               | [51]     |
|                                  | The set of mutants containing engineered disulfide bonds: moderate thermostabilization or significant increase in activity for some of the variants                                                                                                         | Rational design                   | [55,56]  |
|                                  | The mutants with reduced sensitivity to proteases: R213M and R337Q                                                                                                                                                                                          |                                   | [59]     |
|                                  | Structurally destabilized mutants for monitoring <i>in vivo</i> folding and proteomic stress: R188Q, R261Q and R188Q/R261Q                                                                                                                                  |                                   | [66]     |
|                                  | The 3-point mutant S239T/D357Y/A532T with increased resistance to small amounts of chloroform and other organic solvents                                                                                                                                    | Random                            | [70, 71] |
| <i>Lampyris turkestanicus</i>    | 5-point thermostable mutant F14R/L35Q/V182K/I232K/F465R: Q35R/I182R/I232R/E354Q/insertion-R356; 7.4-fold increase in half-life at 35°C: from 2.6 min to 19.2 min                                                                                            | Rational design, SD               | [52]     |
| <i>Luciola cruciata</i>          | Thermostable mutants T217L, T217I, T217V: 7.4-fold increase in half-life at 50°C: from 3.8 min to 28 min                                                                                                                                                    | Random                            | [48]     |
| <i>Luciola lateralis</i>         | The thermostable mutant A217L: 19-fold increase in half-life at 50°C: from 6.5 min to 125 min 70% activity compared with WT [63]                                                                                                                            | SD                                | [47]     |
|                                  | The mutant E490K with increased resistance to benzalkonium chloride                                                                                                                                                                                         | Random                            | [63]     |
| <i>Luciola (Hotaria) parvula</i> | A217L: 0.074% of WT activity; E356R: no significant influence on thermostability; E356R/V368A: 12-fold increase in half-life at 45°C: from 18 min to 210 min                                                                                                | SD                                | [35]     |
| <i>Luciola mingrelica</i>        | 7-point thermostable mutant 4TS: 155-fold increase in half-life at 50°C: from 50 min to 129 h; 158-fold increase in half-life at 45°C: from 13 min to 33.4 h; 20-fold increase in half-life at 50°C: from 2.2 min to 44 min; 190% activity compared with WT | Directed evolution                | [44]     |
|                                  | 5-point thermostable mutant G216N/A217L/S398M: 21-fold increase in half-life at 45°C: from 13 min to 280 min; 70% activity compared with WT                                                                                                                 | Rational design                   | [50]     |
|                                  | The mutant C146S: 1.3-fold increase in thermostability at 42°C and                                                                                                                                                                                          | Rational                          | [44,54]  |

|                           |                                                                                                              |        |      |
|---------------------------|--------------------------------------------------------------------------------------------------------------|--------|------|
|                           | increased oxidation stability                                                                                | design |      |
| <i>Phrixothrix hirtus</i> | The mutants I212L/N351K, I212L, I212L/S463R:<br>Increased thermostability in cell extracts and cells at 37°C | SD     | [19] |

<sup>1</sup>Abbreviations: “random” – random mutagenesis; SD – site-directed mutagenesis (of the previously identified positions in luciferase).
